# Supplementary material for: Polar Particles: Atmospheric Microplastic Pollution in the Arctic Region – an examination of deposited and suspended microplastics in Ny-Ålesund, Svalbard
Source: Research Square preprint supplement (doi:10.21203/rs.3.rs-7543661/v1), 2025-09-25
Supplement: Supplementary file 1 [file 38fddaea805ca622e34b4fec.docx]

**Polar Particles: Atmospheric Microplastic Pollution in the Arctic Region – an examination of deposited and suspended microplastics in Ny-Ålesund, Svalbard**

**Supplementary Information**

Anna MacDonald1*; Nikolaos Evangeliou2; Sabine Eckhardt2; Deonie Castle3; Christopher J. White1; Vernon R. Phoenix1; Dušan Materić4*,

1University of Strathclyde, Department of Civil and Environmental Engineering, Glasgow, UK

2Stiftelsen NILU (former Norwegian Institute for Air Research), Department of Atmospheric & Climate Research (ATMOS), Kjeller, Norway

3 University of Waikato, School of Science, Hamilton, New Zealand

4Helmholtz Centre for Environmental Research, UFZ, Department of Environmental Analytical Chemistry, Leipzig, Germany

*correspondence: [dusan.materic@ufz.de](mailto:dusan.materic@ufz.de) and [anna.macdonald@strath.ac.uk](mailto:anna.macdonald@strath.ac.uk)

**Table X1. Deposition Particle Size Distribution Values (Sample name – D denoting deposition and number denoting number of sample)**

| **Particle size (count)** | **Field Blank Values** | **D7** | **D8** | **D9** | **D10** | **D11** | **D12** | **D13** | **D14** | **D5** | **D16** | **D17** | **D18** | **D19** | **D20** | **D21** | **D22** | **D23** | **D24** | **D25** | **D26** | **D27** | **D28** | **SUM** | **%** |
| --- | --- | --- | --- | --- | --- | --- | --- | --- | --- | --- | --- | --- | --- | --- | --- | --- | --- | --- | --- | --- | --- | --- | --- | --- | --- |
| **1.6-5µm** | 5.33 | 127 | 51 | 211 | 44 | 110 | 93 | 58 | 51 | 46 | 46 | 49 | 60 | 47 | 9 | 91 | 146 | 30 | 33 | 20 | 16 | 89 | 20 | 1447 | 22.05 |
| **5-10µm** | 9.33 | 179 | 94 | 257 | 45 | 151 | 132 | 52 | 53 | 85 | 72 | 64 | 78 | 57 | 28 | 177 | 131 | 39 | 81 | 21 | 28 | 96 | 41 | 1961 | 29.89 |
| **10-20µm** | 7 | 100 | 22 | 151 | 31 | 78 | 92 | 61 | 47 | 50 | 52 | 46 | 56 | 24 | 10 | 93 | 71 | 21 | 91 | 23 | 29 | 101 | 25 | 1274 | 19.42 |
| **20-30µm** | 1.33 | 27 | 7 | 25 | 0 | 13 | 15 | 11 | 5 | 14 | 14 | 12 | 5 | 5 | 3 | 13 | 26 | 6 | 16 | 0 | 3 | 35 | 4 | 259 | 3.95 |
| **30-40µm** | 0.33 | 9 | 3 | 2 | 1 | 11 | 6 | 3 | 2 | 4 | 4 | 4 | 2 | 2 | 0 | 4 | 8 | 3 | 4 | 2 | 1 | 3 | 1 | 79 | 1.20 |
| **40-50µm** | 0.33 | 4 | 2 | 1 | 0 | 2 | 4 | 1 | 0 | 0 | 1 | 3 | 1 | 0 | 0 | 2 | 1 | 4 | 2 | 0 | 0 | 5 | 1 | 34 | 0.52 |
| **50-100µm** | 0 | 1 | 2 | 2 | 0 | 2 | 2 | 1 | 3 | 1 | 6 | 5 | 5 | 4 | 1 | 2 | 3 | 1 | 4 | 2 | 2 | 4 | 0 | 53 | 0.81 |
| **100-150µm** | 0 | 2 | 0 | 1 | 0 | 0 | 0 | 0 | 0 | 0 | 2 | 0 | 0 | 0 | 0 | 0 | 1 | 0 | 0 | 0 | 0 | 0 | 0 | 6 | 0.09 |
| **150-200µm** | 0 | 1 | 0 | 0 | 0 | 0 | 0 | 0 | 0 | 0 | 0 | 0 | 0 | 0 | 0 | 0 | 0 | 0 | 0 | 0 | 0 | 0 | 0 | 1 | 0.02 |
| **200-250µm** | 0 | 0 | 0 | 0 | 0 | 0 | 0 | 0 | 0 | 0 | 0 | 0 | 0 | 0 | 0 | 0 | 0 | 0 | 0 | 0 | 0 | 0 | 0 | 0 | 0.00 |
| **250-300µm** | 0 | 0 | 0 | 0 | 0 | 0 | 0 | 0 | 0 | 0 | 0 | 0 | 0 | 0 | 0 | 0 | 0 | 0 | 0 | 0 | 0 | 0 | 0 | 0 | 0.00 |
| **300-350µm** | 0 | 0 | 0 | 0 | 0 | 0 | 0 | 0 | 0 | 0 | 0 | 0 | 0 | 0 | 0 | 0 | 0 | 0 | 0 | 0 | 0 | 0 | 0 | 0 | 0.00 |
| **350-400µm** | 0 | 0 | 0 | 0 | 0 | 0 | 0 | 0 | 0 | 0 | 0 | 0 | 0 | 0 | 0 | 0 | 0 | 0 | 0 | 0 | 0 | 0 | 0 | 0 | 0.00 |
| **400-450µm** | 0 | 0 | 0 | 0 | 0 | 0 | 0 | 0 | 0 | 0 | 0 | 0 | 0 | 0 | 0 | 0 | 0 | 0 | 0 | 0 | 0 | 0 | 0 | 0 | 0.00 |
| **450-500µm** | 0 | 0 | 0 | 0 | 0 | 0 | 0 | 0 | 0 | 0 | 0 | 0 | 0 | 0 | 0 | 0 | 0 | 0 | 0 | 0 | 0 | 0 | 0 | 0 | 0.00 |
| **500-550µm** | 0 | 0 | 0 | 0 | 0 | 0 | 0 | 0 | 0 | 0 | 0 | 0 | 0 | 0 | 0 | 0 | 0 | 0 | 0 | 0 | 0 | 0 | 0 | 0 | 0.00 |
| **550-600µm** | 0 | 0 | 0 | 0 | 0 | 0 | 0 | 0 | 0 | 0 | 0 | 0 | 0 | 0 | 0 | 0 | 0 | 0 | 0 | 0 | 0 | 0 | 0 | 0 | 0.00 |
| **600-650µm** | 0 | 0 | 0 | 0 | 0 | 0 | 0 | 0 | 0 | 0 | 0 | 0 | 0 | 0 | 0 | 0 | 0 | 0 | 0 | 0 | 0 | 0 | 0 | 0 | 0.00 |
| **650-700µm** | 0 | 0 | 0 | 0 | 0 | 0 | 0 | 0 | 0 | 0 | 0 | 0 | 0 | 0 | 0 | 0 | 0 | 0 | 0 | 0 | 0 | 0 | 0 | 0 | 0.00 |
| **700-750µm** | 0 | 0 | 0 | 0 | 0 | 0 | 0 | 0 | 0 | 0 | 0 | 0 | 0 | 0 | 0 | 0 | 0 | 0 | 0 | 0 | 0 | 0 | 0 | 0 | 0.00 |
| **750-800µm** | 0 | 0 | 0 | 0 | 0 | 0 | 0 | 0 | 0 | 0 | 0 | 0 | 0 | 0 | 0 | 0 | 0 | 0 | 0 | 0 | 0 | 0 | 0 | 0 | 0.00 |
| **800-850µm** | 0 | 0 | 0 | 0 | 0 | 0 | 0 | 0 | 0 | 0 | 0 | 0 | 0 | 0 | 0 | 0 | 0 | 0 | 0 | 0 | 0 | 0 | 0 | 0 | 0.00 |
| **850-900µm** | 0 | 0 | 0 | 0 | 0 | 0 | 0 | 0 | 0 | 0 | 0 | 0 | 0 | 0 | 0 | 0 | 0 | 0 | 0 | 0 | 0 | 0 | 0 | 0 | 0.00 |
| **900-950µm** | 0 | 0 | 0 | 0 | 0 | 0 | 0 | 0 | 0 | 0 | 0 | 0 | 0 | 0 | 0 | 0 | 0 | 0 | 0 | 0 | 0 | 0 | 0 | 0 | 0.00 |
| **950-1000µm** | 0 | 0 | 0 | 0 | 0 | 0 | 0 | 0 | 0 | 0 | 0 | 0 | 0 | 0 | 0 | 0 | 0 | 0 | 0 | 0 | 0 | 0 | 0 | 0 | 0.00 |
| **1000-2000µm** | 0 | 0 | 0 | 0 | 0 | 0 | 0 | 0 | 0 | 0 | 0 | 0 | 0 | 0 | 0 | 0 | 0 | 0 | 0 | 0 | 0 | 0 | 0 | 0 | 0.00 |
| **2000-3000µm** | 0 | 0 | 0 | 0 | 0 | 0 | 0 | 0 | 0 | 0 | 0 | 0 | 0 | 0 | 0 | 0 | 0 | 0 | 0 | 0 | 0 | 0 | 0 | 0 | 0.00 |
| **3000-4000µm** | 0 | 0 | 0 | 0 | 0 | 0 | 0 | 0 | 0 | 0 | 0 | 0 | 0 | 0 | 0 | 0 | 0 | 0 | 0 | 0 | 0 | 0 | 0 | 0 | 0.00 |
| **4000-5000µm** | 0 | 0 | 0 | 0 | 0 | 0 | 0 | 0 | 0 | 0 | 0 | 0 | 0 | 0 | 0 | 0 | 0 | 0 | 0 | 0 | 0 | 0 | 0 | 0 | 0.00 |

**Table X2. Nanotank Particle Size Distribution Values (Sample name – D denoting nanotank and number denoting number of sample)**

| **Particle size (count)** | **Nano**  **blank** | **N1** | **N2** | **N3** | **N4** | **N5** | **N6** | **N7** | **N15** | **N16** | **N17** | **N18** | **N19** | **N20** | **N21** | **N22** | **N23** | **N24** | **N25** | **N26** | **N27** | **N28** | **SUM** | **%** |
| --- | --- | --- | --- | --- | --- | --- | --- | --- | --- | --- | --- | --- | --- | --- | --- | --- | --- | --- | --- | --- | --- | --- | --- | --- |
| **1.6-5 µm** | 13.33 | 17 | 17 | 3 | 19 | 20 | 11 | 25 | 11 | 45 | 70 | 4 | 5 | 4 | 9 | 31 | 12 | 5 | 31 | 29 | 21 | 7 | 396 | 17.28 |
| **5-10 µm** | 35.33 | 37 | 30 | 14 | 35 | 68 | 21 | 23 | 37 | 77 | 96 | 19 | 17 | 19 | 25 | 65 | 38 | 19 | 16 | 85 | 50 | 41 | 832 | 36.30 |
| **10-20 µm** | 19.33 | 12 | 16 | 15 | 24 | 15 | 8 | 17 | 17 | 62 | 51 | 6 | 16 | 14 | 24 | 50 | 32 | 6 | 14 | 62 | 38 | 27 | 526 | 22.95 |
| **20-30 µm** | 2.67 | 0 | 4 | 6 | 2 | 1 | 1 | 1 | 5 | 3 | 4 | 2 | 3 | 0 | 2 | 13 | 4 | 6 | 3 | 8 | 5 | 6 | 79 | 3.45 |
| **30-40 µm** | 1.33 | 1 | 0 | 3 | 0 | 0 | 1 | 0 | 4 | 2 | 5 | 1 | 1 | 0 | 2 | 2 | 0 | 1 | 1 | 3 | 1 | 1 | 29 | 1.27 |
| **40-50µm** | 0.67 | 0 | 2 | 0 | 0 | 0 | 0 | 0 | 0 | 0 | 0 | 0 | 0 | 1 | 1 | 3 | 1 | 1 | 3 | 2 | 0 | 1 | 15 | 0.65 |
| **50-100µm** | 0.00 | 1 | 0 | 0 | 0 | 1 | 0 | 1 | 1 | 0 | 3 | 0 | 0 | 0 | 1 | 1 | 0 | 2 | 1 | 0 | 2 | 0 | 14 | 0.61 |
| **100-150µm** | 0.00 | 0 | 0 | 0 | 0 | 0 | 0 | 0 | 0 | 0 | 0 | 0 | 0 | 0 | 0 | 0 | 0 | 0 | 0 | 0 | 0 | 0 | 0 | 0.00 |
| **150-200µm** | 0.00 | 0 | 0 | 0 | 0 | 0 | 0 | 0 | 0 | 0 | 0 | 0 | 0 | 1 | 0 | 0 | 1 | 0 | 0 | 0 | 0 | 0 | 2 | 0.09 |
| **200-250µm** | 0.00 | 1 | 0 | 0 | 0 | 0 | 0 | 0 | 0 | 0 | 0 | 1 | 0 | 0 | 0 | 1 | 0 | 0 | 0 | 0 | 0 | 0 | 3 | 0.13 |
| **250-300µm** | 0.00 | 0 | 0 | 0 | 0 | 0 | 0 | 0 | 0 | 0 | 0 | 0 | 0 | 0 | 0 | 0 | 0 | 0 | 0 | 0 | 0 | 0 | 0 | 0.00 |
| **300-350µm** | 0.00 | 0 | 0 | 0 | 0 | 0 | 0 | 0 | 0 | 0 | 0 | 0 | 0 | 0 | 0 | 0 | 0 | 0 | 0 | 0 | 0 | 0 | 0 | 0.00 |
| **350-400µm** | 0.00 | 0 | 0 | 0 | 0 | 0 | 0 | 0 | 0 | 0 | 0 | 0 | 0 | 0 | 0 | 0 | 0 | 0 | 0 | 0 | 0 | 0 | 0 | 0.00 |
| **400-450µm** | 0.00 | 0 | 0 | 0 | 0 | 0 | 0 | 0 | 0 | 0 | 0 | 0 | 0 | 0 | 0 | 0 | 0 | 0 | 0 | 0 | 0 | 0 | 0 | 0.00 |
| **450-500µm** | 0.00 | 0 | 0 | 0 | 0 | 0 | 0 | 0 | 0 | 0 | 0 | 0 | 0 | 0 | 0 | 0 | 0 | 0 | 0 | 0 | 0 | 0 | 0 | 0.00 |
| **500-550µm** | 0.00 | 0 | 0 | 0 | 0 | 0 | 0 | 0 | 0 | 0 | 0 | 0 | 0 | 0 | 0 | 0 | 0 | 0 | 0 | 0 | 0 | 0 | 0 | 0.00 |
| **550-600µm** | 0.00 | 0 | 0 | 0 | 0 | 0 | 0 | 0 | 0 | 0 | 0 | 0 | 0 | 0 | 0 | 0 | 0 | 0 | 0 | 0 | 0 | 0 | 0 | 0.00 |
| **600-650µm** | 0.00 | 0 | 0 | 0 | 0 | 0 | 0 | 0 | 0 | 0 | 0 | 0 | 0 | 0 | 0 | 0 | 0 | 0 | 0 | 0 | 0 | 0 | 0 | 0.00 |
| **650-700µm** | 0.00 | 0 | 0 | 0 | 0 | 0 | 0 | 0 | 0 | 0 | 0 | 0 | 0 | 0 | 0 | 0 | 0 | 0 | 0 | 0 | 0 | 0 | 0 | 0.00 |
| **700-750µm** | 0.00 | 0 | 0 | 0 | 0 | 0 | 0 | 0 | 0 | 0 | 0 | 0 | 0 | 0 | 0 | 0 | 0 | 0 | 0 | 0 | 0 | 0 | 0 | 0.00 |
| **750-800µm** | 0.00 | 0 | 0 | 0 | 0 | 0 | 0 | 0 | 0 | 0 | 0 | 0 | 0 | 0 | 0 | 0 | 0 | 0 | 0 | 0 | 0 | 0 | 0 | 0.00 |
| **800-850µm** | 0.00 | 0 | 0 | 0 | 0 | 0 | 0 | 0 | 0 | 0 | 0 | 0 | 0 | 0 | 0 | 0 | 0 | 0 | 0 | 0 | 0 | 0 | 0 | 0.00 |
| **850-900µm** | 0.00 | 0 | 0 | 0 | 0 | 0 | 0 | 0 | 0 | 0 | 0 | 0 | 0 | 0 | 0 | 0 | 0 | 0 | 0 | 0 | 0 | 0 | 0 | 0.00 |
| **900-950µm** | 0.00 | 0 | 0 | 0 | 0 | 0 | 0 | 0 | 0 | 0 | 0 | 0 | 0 | 0 | 0 | 0 | 0 | 0 | 0 | 0 | 0 | 0 | 0 | 0.00 |
| **950-1000µm** | 0.00 | 0 | 0 | 0 | 0 | 0 | 0 | 0 | 0 | 0 | 0 | 0 | 0 | 0 | 0 | 0 | 0 | 0 | 0 | 0 | 0 | 0 | 0 | 0.00 |
| **1000-2000µm** | 0.00 | 0 | 0 | 0 | 0 | 0 | 0 | 0 | 0 | 0 | 0 | 0 | 0 | 0 | 0 | 0 | 0 | 0 | 0 | 0 | 0 | 0 | 0 | 0.00 |
| **2000-3000µm** | 0.00 | 0 | 0 | 0 | 0 | 0 | 0 | 0 | 0 | 0 | 0 | 0 | 0 | 0 | 0 | 0 | 0 | 0 | 0 | 0 | 0 | 0 | 0 | 0.00 |
| **3000-4000µm** | 0.00 | 0 | 0 | 0 | 0 | 0 | 0 | 0 | 0 | 0 | 0 | 0 | 0 | 0 | 0 | 0 | 0 | 0 | 0 | 0 | 0 | 0 | 0 | 0.00 |
| **4000-5000µm** | 0.00 | 0 | 0 | 0 | 0 | 0 | 0 | 0 | 0 | 0 | 0 | 0 | 0 | 0 | 0 | 0 | 0 | 0 | 0 | 0 | 0 | 0 | 0 | 0.00 |

**Table X3. Direct Air Filtration Particle Size Distribution Values (Sample name – AF denoting air filtration and number denoting number of sample)**

| **Particle size (count)** | **Field Blank Values** | **AF2** | **AF5** | **AF6** | **AF7** | **AF8** | **AF9** | **SUM** | **%** |
| --- | --- | --- | --- | --- | --- | --- | --- | --- | --- |
| **<2µm** | 4.67 | 6 | 48 | 42 | 4 | 4 | 5 | 113.67 | 4.23 |
| **2-5 µm** | 6 | 8 | 393 | 155 | 71 | 62 | 49 | 744.00 | 27.69 |
| **1.6-5 µm** | 10.67 | 14 | 441 | 197 | 75 | 66 | 54 | 857.67 | 31.92 |
| **5-10 µm** | 9.33 | 19 | 384 | 113 | 93 | 114 | 82 | 814.33 | 30.31 |
| **10-20 µm** | 7 | 11 | 59 | 3 | 25 | 13 | 16 | 134.00 | 4.99 |
| **20-30 µm** | 1.33 | 1 | 2 | 0 | 2 | 3 | 2 | 11.33 | 0.42 |
| **30-40 µm** | 0.33 | 0 | 0 | 0 | 1 | 2 | 1 | 4.33 | 0.16 |
| **40-50µm** | 0.33 | 1 | 0 | 0 | 0 | 0 | 0 | 1.33 | 0.05 |
| **50-100µm** | 0 | 0 | 1 | 0 | 0 | 0 | 3 | 4 | 0.15 |
| **100-150µm** | 0 | 0 | 1 | 0 | 0 | 0 | 0 | 1 | 0.04 |
| **150-200µm** | 0 | 0 | 0 | 0 | 1 | 0 | 0 | 1 | 0.04 |
| **200-250µm** | 0 | 0 | 0 | 0 | 0 | 0 | 0 | 0 | 0.00 |
| **250-300µm** | 0 | 0 | 0 | 0 | 0 | 0 | 0 | 0 | 0.00 |
| **300-350µm** | 0 | 0 | 0 | 0 | 0 | 0 | 0 | 0 | 0.00 |
| **350-400µm** | 0 | 0 | 0 | 0 | 0 | 0 | 0 | 0 | 0.00 |
| **400-450µm** | 0 | 0 | 0 | 0 | 0 | 0 | 0 | 0 | 0.00 |
| **450-500µm** | 0 | 0 | 0 | 0 | 0 | 0 | 0 | 0 | 0.00 |
| **500-550µm** | 0 | 0 | 0 | 0 | 0 | 0 | 0 | 0 | 0.00 |
| **550-600µm** | 0 | 0 | 0 | 0 | 0 | 0 | 0 | 0 | 0.00 |
| **600-650µm** | 0 | 0 | 0 | 0 | 0 | 0 | 0 | 0 | 0.00 |
| **650-700µm** | 0 | 0 | 0 | 0 | 0 | 0 | 0 | 0 | 0.00 |
| **700-750µm** | 0 | 0 | 0 | 0 | 0 | 0 | 0 | 0 | 0.00 |
| **750-800µm** | 0 | 0 | 0 | 0 | 0 | 0 | 0 | 0 | 0.00 |
| **800-850µm** | 0 | 0 | 0 | 0 | 0 | 0 | 0 | 0 | 0.00 |
| **850-900µm** | 0 | 0 | 0 | 0 | 0 | 0 | 0 | 0 | 0.00 |
| **900-950µm** | 0 | 0 | 0 | 0 | 0 | 0 | 0 | 0 | 0.00 |
| **950-1000µm** | 0 | 0 | 0 | 0 | 0 | 0 | 0 | 0 | 0.00 |
| **1000-2000µm** | 0 | 0 | 0 | 0 | 0 | 0 | 0 | 0 | 0.00 |
| **2000-3000µm** | 0 | 0 | 0 | 0 | 0 | 0 | 0 | 0 | 0.00 |
| **3000-4000µm** | 0 | 0 | 0 | 0 | 0 | 0 | 0 | 0 | 0.00 |
| **4000-5000µm** | 0 | 0 | 0 | 0 | 0 | 0 | 0 | 0 | 0.00 |

**Table X5. Microplastic Concentrations expressed as MP/m3**

| **Sample Name** | **MP/m3/day** | **Dates (2021)** | **Standard Deviation** | **Analysis Type** |
| --- | --- | --- | --- | --- |
| **Direct Air Filter 1** | 0.29 | 17.05-20.05 | 0.21 | Raman |
| **Direct Air Filter 2** | 2.26 | 20.05-23.05 | 17.97 | Nile Red |
| **Direct Air Filter 3** | 0.24 | 23.05-26.05 | 0.16 | Raman |
| **Direct Air Filter 4** | 0.58 | 26.05-29.05 | 0.18 | Raman |
| **Direct Air Filter 5** | 49.06 | 29.05-1.06 | 17.97 | Nile Red |
| **Direct Air Filter 6** | 12.32 | 1.05-4.06 | 17.97 | Nile Red |
| **Direct Air Filter 7** | 6.80 | 4.06-7.06 | 17.97 | Nile Red |
| **Direct Air Filter 8** | 4.67 | 07.06-10.06 | 17.97 | Nile Red |
| **Direct Air Filter 9** | 3.45 | 10.06-13.06 | 17.97 | Nile Red |
| **Deposition 1** | 5.29 | 18.05 | 3.74 | Raman |
| **Deposition 2** | 5.29 | 19.05 | 2.16 | Raman |
| **Deposition 3** | 7.06 | 20.05 | 1.25 | Raman |
| **Deposition 4** | 4.41 | 21.05 | 1.25 | Raman |
| **Deposition 5** | 45.88 | 22.05 | 1.25 | Raman |
| **Deposition 6** | 4.41 | 23.05 | 1.25 | Raman |
| **Deposition 7** | 87.24 | 24.05 | 29.57 | Nile Red |
| **Deposition 8** | 33.81 | 25.05 | 29.57 | Nile Red |
| **Deposition 9** | 127.45 | 26.05 | 29.57 | Nile Red |
| **Deposition 10** | 22.11 | 27.05 | 29.57 | Nile Red |
| **Deposition 11** | 71.03 | 28.05 | 29.57 | Nile Red |
| **Deposition 12** | 66.43 | 29.05 | 29.57 | Nile Red |
| **Deposition 13** | 35.01 | 30.05 | 29.57 | Nile Red |
| **Deposition 14** | 29.81 | 31.05 | 29.57 | Nile Red |
| **Deposition 15** | 37.62 | 1.06 | 29.57 | Nile Red |
| **Deposition 16** | 36.61 | 2.06 | 29.57 | Nile Red |
| **Deposition 17** | 34.21 | 3.06 | 29.57 | Nile Red |
| **Deposition 18** | 39.02 | 4.06 | 29.57 | Nile Red |
| **Deposition 19** | 25.41 | 5.06 | 29.57 | Nile Red |
| **Deposition 20** | 8.20 | 6.06 | 29.57 | Nile Red |
| **Deposition 21** | 74.03 | 7.06 | 29.57 | Nile Red |
| **Deposition 22** | 74.83 | 8.06 | 29.57 | Nile Red |
| **Deposition 23** | 18.41 | 9.06 | 29.57 | Nile Red |
| **Deposition 24** | 43.82 | 10.06 | 29.57 | Nile Red |
| **Deposition 25** | 11.20 | 11.06 | 29.57 | Nile Red |
| **Deposition 26** | 13.41 | 12.06 | 29.57 | Nile Red |
| **Deposition 27** | 64.23 | 13.06 | 29.57 | Nile Red |
| **Deposition 28** | 18.41 | 14.06 | 29.57 | Nile Red |
| **Nanotank 1** | 7.12 | 18.05 | 1.97 | Nile Red |
| **Nanotank 2** | 3.74 | 19.05 | 1.97 | Nile Red |
| **Nanotank 3** | 0.14 | 20.05 | 1.97 | Nile Red |
| **Nanotank 4** | 0.65 | 21.05 | 1.97 | Nile Red |
| **Nanotank 5** | 1.43 | 22.05 | 1.97 | Nile Red |
| **Nanotank 6** | 0.00 | 23.05 | 0.00 | Nile Red |
| **Nanotank 7** | 0.41 | 24.05 | 1.97 | Nile Red |
| **Nanotank 8** | 0.90 | 25.05 | 0.48 | Raman |
| **Nanotank 9** | 1.92 | 26.05 | 1.37 | Raman |
| **Nanotank 10** | 0.77 | 27.05 | 0.63 | Raman |
| **Nanotank 11** | 0.64 | 28.05 | 0.65 | Raman |
| **Nanotank 12** | 1.73 | 29.05 | 0.31 | Raman |
| **Nanotank 13** | 1.28 | 30.05 | 0.96 | Raman |
| **Nanotank 14** | 1.1 | 31.05 | 0 | Raman |
| **Nanotank 15** | 0.49 | 1.06 | 1.97 | Nile Red |
| **Nanotank 16** | 3.64 | 2.06 | 1.97 | Nile Red |
| **Nanotank 17** | 4.84 | 3.06 | 1.97 | Nile Red |
| **Nanotank 18** | 0.03 | 4.06 | 1.97 | Nile Red |
| **Nanotank 19** | 0.05 | 5.06 | 1.97 | Nile Red |
| **Nanotank 20** | 0.03 | 6.06 | 1.97 | Nile Red |
| **Nanotank 21** | 0.29 | 7.06 | 1.97 | Nile Red |
| **Nanotank 22** | 2.93 | 8.06 | 1.97 | Nile Red |
| **Nanotank 23** | 0.87 | 9.06 | 1.97 | Nile Red |
| **Nanotank 24** | 0.17 | 10.06 | 1.97 | Nile Red |
| **Nanotank 25** | 0.54 | 11.06 | 1.97 | Nile Red |
| **Nanotank 26** | 3.69 | 12.06 | 1.97 | Nile Red |
| **Nanotank 27** | 1.72 | 13.06 | 1.97 | Nile Red |
| **Nanotank 28** | 0.83 | 14.06 | 1.97 | Nile Red |

**Table X5. Weather Data used for Correlation (Norwegian Climate Institute)**

| **Sample** | **Date (2021)** | **Mean Cloud Cover (24hr)** | **Average air pressure, sea level (hPa; 24 h)** | **Average of mean wind speed (m/s; 24 h)** | **Precipitation**  **(mm)** | **Snow Cover (%)** | **Snow Depth (mm)** | **Wind Direction** | **Mean Dew Point Temperature (oC; 24hr)** | **Maximum Relative Humidity (24 hr)** | **Mixing Ratio** |
| --- | --- | --- | --- | --- | --- | --- | --- | --- | --- | --- | --- |
| **Direct Air Filter 1** | 17.05-20.05 | 5.325 | 1022.3 | 2.275 | 0.25 | 4 | 45 | SE | -6.525 | 87.75 | 2.325 |
| **Direct Air Filter 2** | 20.05-23.05 | 4 | 1016.8 | 4 | 1.575 | 4 | 53 | SE | -8.1 | 81.75 | 2.075 |
| **Direct Air Filter 3** | 23.05-26.05 | 6.675 | 1019.075 | 3.925 | 0.05 | 4 | 52 | NW | -6.125 | 84.75 | 2.425 |
| **Direct Air Filter 4** | 26.05-29.05 | 6.75 | 1013.15 | 4.125 | 0.1 | 4 | 47.5 | NW | -4.25 | 87.5 | 2.8 |
| **Direct Air Filter 5** | 29.05-1.06 | 5.7 | 1012.8 | 2.5 | 0.05 | 4 | 42.25 | SE | -2.2 | 89.5 | 89.5 |
| **Direct Air Filter 6** | 1.05-4.06 | 8 | 1006.5 | 5.1 | 3.2 | 3 | 26.75 | NW | 0.475 | 96.25 | 3.95 |
| **Direct Air Filter 7** | 4.06-7.06 | 8 | 1011.3 | 2.3 | 1.125 | 3 | 15 | NW | -0.275 | 95.5 | 3.7 |
| **Direct Air Filter 8** | 07.06-10.06 | 8 | 1000.3 | 4.9 | 0.65 | 3 | 8.75 | NW | -1.05 | 92.5 | 3.525 |
| **Direct Air Filter 9** | 10.06-13.06 | 4.3 | 1005.5 | 5.6 | 0.2 | 3 | 10 | SE | -3.725 | -3.725 | 2.925 |
| **Deposition and Nanotank 1** | 18.05 | 5 | 1024.8 | 2.1 | 0 | 4 | 46 | SE | -6.3 | 85 | 2.1 |
| **Deposition and Nanotank 2** | 19.05 | 3.3 | 1022.8 | 1.2 | 0 | 4 | 46 | SE | -6.5 | 91 | 2.3 |
| **Deposition and Nanotank 3** | 20.05 | 8 | 1017.9 | 1.4 | 0 | 4 | 46 | SE | -5.2 | 86 | 2.3 |
| **Deposition and Nanotank 4** | 21.05 | 8 | 1016.3 | 3 | 1 | 4 | 56 | SE | -8.3 | 89 | 2.6 |
| **Deposition and Nanotank 5** | 22.05 | 7.3 | 1016.1 | 3.9 | 4.3 | 4 | 56 | NW | -10.7 | 81 | 2 |
| **Deposition and Nanotank 6** | 23.05 | 4 | 1016.8 | 4 | 1 | 4 | 54 | W | -8.2 | 75 | 1.7 |
| **Deposition and Nanotank 7** | 24.05 | 6.7 | 1020.7 | 5.2 | 0 | 4 | 52 | NW | -7.8 | 82 | 2 |
| **Deposition and Nanotank 8** | 25.05 | 8 | 1024.6 | 3.8 | 0 | 4 | 52 | W | -6.1 | 82 | 2.1 |
| **Deposition and Nanotank 9** | 26.05 | 8 | 1014.2 | 2.7 | 0 | 4 | 50 | NW | -2.4 | 86 | 2.4 |
| **Deposition and Nanotank 10** | 27.05 | 4.3 | 1007.9 | 7.8 | 0.2 | 4 | 48 | NW | -4.3 | 89 | 3.2 |
| **Deposition and Nanotank 11** | 28.05 | 7 | 1017.4 | 4.3 | 0.2 | 4 | 47 | SE | -6.7 | 93 | 2.8 |
| **Deposition and Nanotank 12** | 29.05 | 7.7 | 1013.1 | 1.7 | 0 | 4 | 45 | SW | -3.6 | 79 | 2.3 |
| **Deposition and Nanotank 13** | 30.05 | 5.7 | 1006.5 | 2.1 | 0 | 4 | 43 | SE | -3.1 | 89 | 2.9 |
| **Deposition and Nanotank 14** | 31.05 | 6 | 1012.1 | 4.4 | 0 | 4 | 42 | SE | -2.8 | 89 | 3 |
| **Deposition and Nanotank 15** | 1.06 | 5.7 | 1012.8 | 2.5 | 0 | 4 | 39 | SE | 0.7 | 85 | 3.1 |
| **Deposition and Nanotank 16** | 2.06 | 8 | 1004.6 | 5.7 | 0.2 | 3 | 30 | SW | 1.7 | 95 | 4 |
| **Deposition and Nanotank 17** | 3.06 | 5.7 | 1009.4 | 4.6 | 0 | 3 | 23 | SE | -0.8 | 100 | 4.3 |
| **Deposition and Nanotank 18** | 4.06 | 8 | 1006.5 | 5.1 | 10.5 | 3 | 15 | NW | 0.3 | 92 | 3.6 |
| **Deposition and Nanotank 19** | 5.06 | 8 | 1016.1 | 4.3 | 2.1 | 3 | 15 | NW | -1.1 | 98 | 3.9 |
| **Deposition and Nanotank 20** | 6.06 | 4.3 | 1020.7 | 2.2 | 0.8 | 3 | 15 | SE | -1.2 | 92 | 3.5 |
| **Deposition and Nanotank 21** | 7.06 | 8 | 1011.3 | 2.3 | 1.6 | 3 | 15 | NW | 0.9 | 92 | 3.4 |
| **Deposition 22** | 8.06 | 7.7 | 1008.5 | 2.2 | 0 | 3 | 12 | NW | -1.3 | 100 | 4 |
| **Deposition 23** | 9.06 | 4.7 | 1002.6 | 2.3 | 2.4 | 3 | 6 | NW | -1.8 | 92 | 3.5 |
| **Deposition 24** | 10.06 | 8 | 1000.3 | 4.9 | 0 | 3 | 2 | NW | -2 | 88 | 3.3 |
| **Deposition 25** | 11.06 | 5 | 1000.6 | 3.3 | 0.2 | 3 | 0 | NW | -2.8 | 90 | 3.3 |
| **Deposition 26** | 12.06 | 2.7 | 1002.9 | 2.3 | 0.6 | 3 | 0 | SE | -4.7 | 85 | 3.1 |
| **Deposition 27** | 13.06 | 4.3 | 1005.5 | 5.6 | 0 | 3 | 0 | SE | -5.4 | 70 | 2.7 |
| **Deposition 28** | 14.06 | 7 | 999.8 | 5.5 | 0 | 3 | 0 | NW | -5 | 62 | 2.6 |

**SUPPLEMENTARY FIGURES**

**
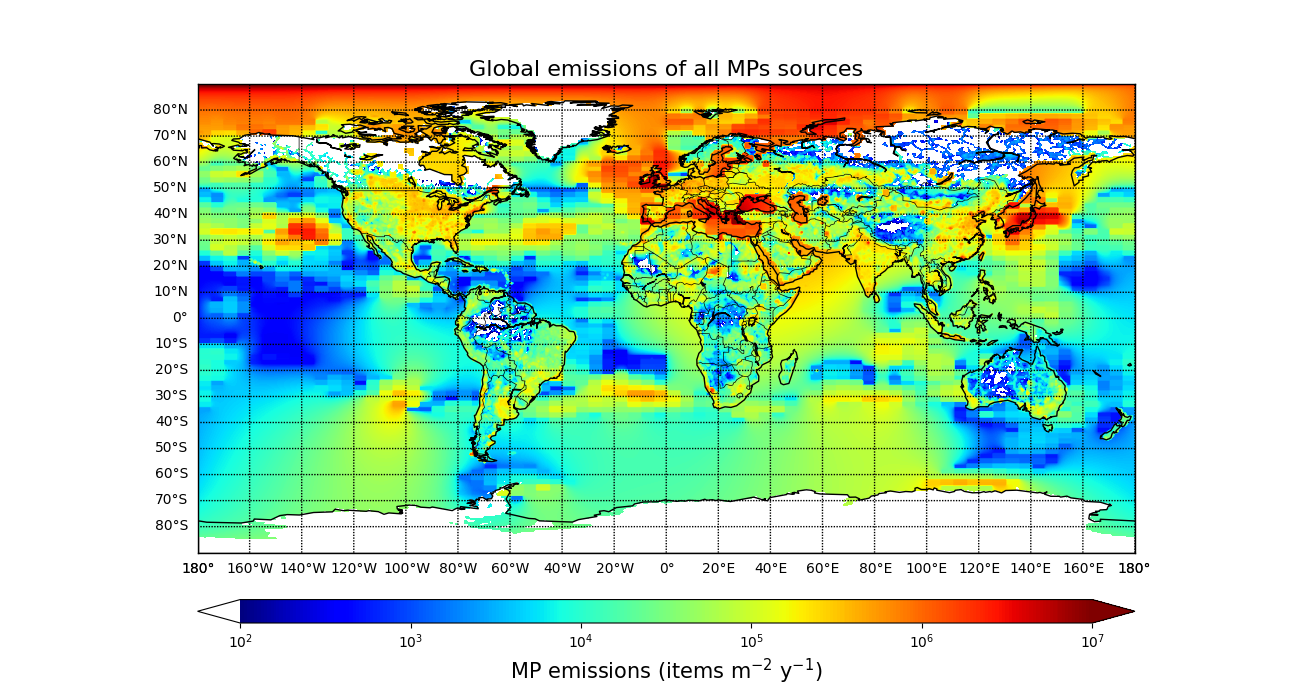
**

**Fig. X1: Global emissions of MP (5-250 um) updated from Evangeliou et al. (2022). All sources are plotted, namely oceanic, agricultural, soil/mineral dust, road dust and clothing fibers.**

**
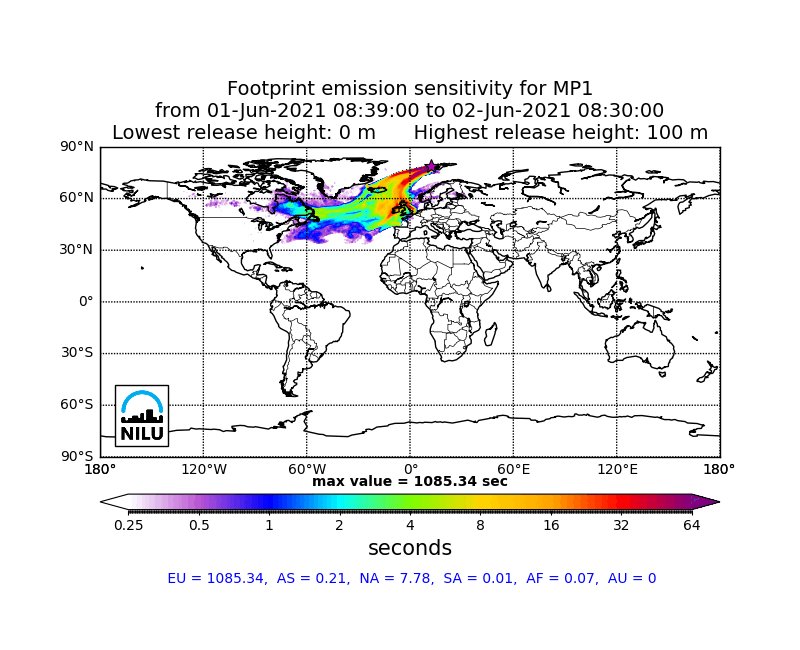
**

**Fig. X2: Footprint emissions sensitivity of MP arriving at Svalbard on June 1st, 2021, when the largest surface concentrations were detected.**

**
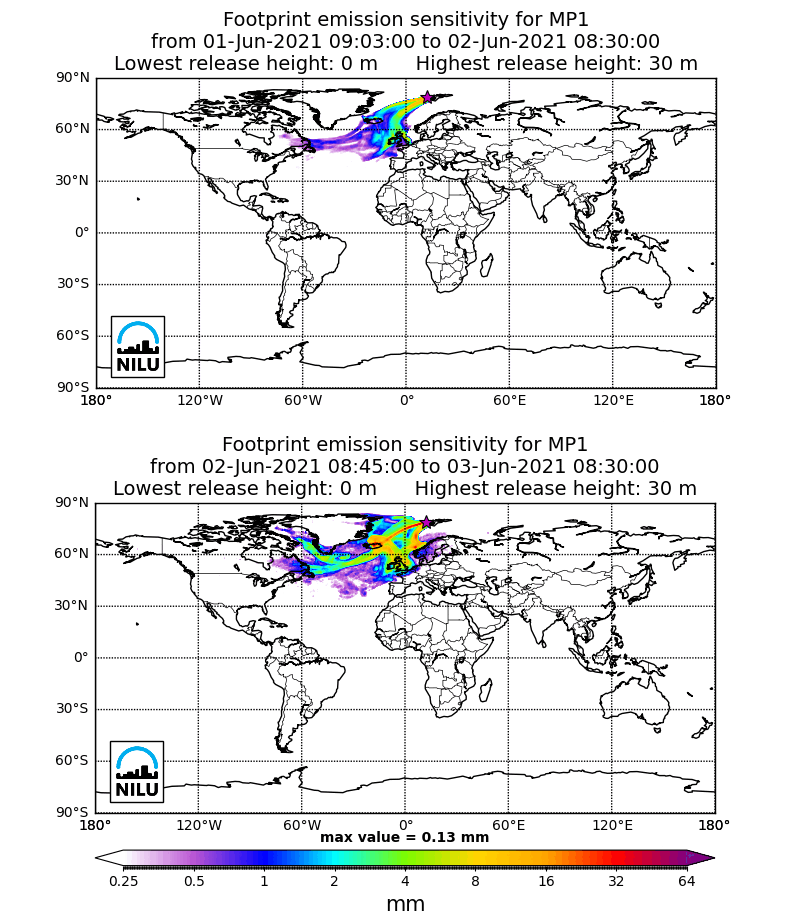
**

**Fig. X3: Footprint emissions sensitivity of MP arriving and depositing at Svalbard due to dry deposition. Here, we have assumed that MP are slightly affected by wet deposition (in cloud and below cloud scavenging), as they are macromolecular polymers and therefore highly hydrophobic.**
